# Supplementary material for: Initiator tRNA lacking 1-methyladenosine is targeted by the rapid tRNA decay pathway in evolutionarily distant yeast species
Source: PubMed Central journal article supplement (PMC9362929; doi:10.1371/journal.pgen.1010215), 2022-07-28

A

|                        | <i>dhp1-7</i><br>(R177P) | <i>dhp1-11</i><br><i>dhp1-14</i><br>(Y178S) | <i>dhp1-12</i><br>(366ins) | <i>dhp1-13</i><br><i>dhp1-8</i><br>(G373D)                                                  | <i>dhp1-10</i><br>(S697C)                                               | <i>dhp1-9</i><br>(L743R)                                                                                                      |
|------------------------|--------------------------|---------------------------------------------|----------------------------|---------------------------------------------------------------------------------------------|-------------------------------------------------------------------------|-------------------------------------------------------------------------------------------------------------------------------|
| <i>S. pombe</i>        | TLAKSLR                  | YYIINKL                                     | PHMGGYLTLDG                | SVNLARAEVILS                                                                                | DENSEIIDFYPENFTIDLN                                                     | LNAVSKIY <sup>Q</sup> LT <sup>E</sup> EE <sup>S</sup> KR <sup>N</sup> E                                                       |
| <i>D. discoideum</i>   | RVAESLR                  | TYVAEKL                                     | PSFDDYLVSN                 | GEVNF <sup>P</sup> RL <sup>S</sup> Q <sup>I</sup> F <sup>V</sup>                            | VEESPIIEFYPRAFRIDRG                                                     | LKTISKTE <sup>P</sup> LL <sup>T</sup> EE <sup>E</sup> V <sup>D</sup> R <sup>N</sup> T                                         |
| <i>S. cerevisiae</i>   | KLAAALR                  | YWTAFKL                                     | PKLKYMTCDG                 | VLN <sup>L</sup> PS <sup>V</sup> ET <sup>L</sup> L <sup>Q</sup>                             | EPDSEIIDFYPEEFPIDMN                                                     | LTAVRAQ <sup>Y</sup> PL <sup>L</sup> SDA <sup>E</sup> R <sup>A</sup> R <sup>N</sup> I                                         |
| <i>A. thaliana</i>     | VLSIALQ                  | YYVHLRL                                     | RSFDGYLTDG                 | CKP <sup>N</sup> L <sup>K</sup> R <sup>V</sup> E <sup>Q</sup> F <sup>I</sup> Q              | DPNSPIIDFYPTDFEVD <sup>M</sup> N                                        | LEAVSEVEFT <sup>L</sup> T <sup>D</sup> EE <sup>K</sup> R <sup>R</sup> N <sup>S</sup>                                          |
| <i>O. sativa</i>       | VLSIALQ                  | YYIHLRL                                     | PSMGGYLTDA                 | CTPDL <sup>N</sup> K <sup>V</sup> EH <sup>F</sup> I <sup>Q</sup>                            | DANSPIIDFYPTDFEVD <sup>M</sup> N                                        | LAEIKKVEHT <sup>L</sup> T <sup>P</sup> EE <sup>A</sup> R <sup>R</sup> N <sup>S</sup>                                          |
| <i>O. tauri</i>        | RLSEALK                  | YYVHDRL                                     | PTLGGYLCAD                 | GR <sup>N</sup> LP <sup>V</sup> EN <sup>F</sup> V <sup>Q</sup>                              | DKDSPIIDFYPEDFDL <sup>D</sup> M <sup>N</sup>                            | LEQ <sup>T</sup> DM <sup>L</sup> EY <sup>T</sup> LT <sup>A</sup> EE <sup>K</sup> R <sup>R</sup> N <sup>S</sup>                |
| <i>D. melanogaster</i> | RLSKCLH                  | YFVHDRQ                                     | YKTRGYLTD                  | SGDV <sup>N</sup> LD <sup>R</sup> V <sup>Q</sup> L <sup>I</sup> M <sup>T</sup>              | DPESPIIDFYPEDFKID <sup>L</sup> N                                        | FKALV <sup>P</sup> Y <sup>V</sup> D <sup>Q</sup> L <sup>T</sup> G <sup>E</sup> E <sup>V</sup> K <sup>R</sup> N <sup>K</sup>   |
| <i>H. sapiens</i>      | NLAKCLR                  | YYIADRL                                     | HKTGGYLTES                 | SGY <sup>V</sup> N <sup>L</sup> Q <sup>R</sup> V <sup>Q</sup> M <sup>I</sup> M <sup>L</sup> | DPDSSIIDFYPEDF <sup>A</sup> ID <sup>L</sup> N                           | RAALEEV <sup>P</sup> Y <sup>P</sup> DL <sup>T</sup> PE <sup>E</sup> T <sup>R</sup> R <sup>N</sup> S                           |
| <i>M. musculus</i>     | NLAKCLR                  | YYIADRL                                     | HKTGGYLTES                 | SGY <sup>V</sup> N <sup>L</sup> Q <sup>R</sup> V <sup>Q</sup> M <sup>I</sup> M <sup>L</sup> | DPDSSIIDFYPEDF <sup>A</sup> ID <sup>L</sup> N                           | RAALEEV <sup>P</sup> Y <sup>P</sup> DL <sup>T</sup> PE <sup>E</sup> N <sup>R</sup> R <sup>N</sup> S                           |
| <i>X. tropicalis</i>   | NLAKCLR                  | YYIADRL                                     | HKTGGYLTDS                 | GFV <sup>N</sup> LD <sup>R</sup> V <sup>Q</sup> M <sup>I</sup> M <sup>L</sup>               | DPDSSIIDFYPD <sup>D</sup> F <sup>A</sup> ID <sup>L</sup> N              | RAALEEV <sup>P</sup> Y <sup>P</sup> DL <sup>T</sup> PD <sup>E</sup> T <sup>R</sup> R <sup>N</sup> S                           |
| <i>C. elegans</i>      | RLHQKLD                  | DWIKTKS                                     | PTLDGYINE                  | AGY <sup>L</sup> N <sup>L</sup> S <sup>R</sup> E <sup>A</sup> F <sup>L</sup> Q              | PAKSPICDFYPANFET <sup>L</sup> DLN                                       | LEA <sup>I</sup> E <sup>A</sup> K <sup>R</sup> S <sup>R</sup> L <sup>T</sup> SE <sup>E</sup> N <sup>A</sup> R <sup>N</sup> S  |
| <i>T. brucei</i>       | RISEHFQ                  | YFIMMKM                                     | LLAHTYLTDM                 | GR <sup>I</sup> D <sup>W</sup> R <sup>A</sup> V <sup>E</sup> G <sup>W</sup> L <sup>Q</sup>  | --NSPLARY <sup>F</sup> PE <sup>K</sup> L <sup>Q</sup> ID <sup>R</sup> E | LAA <sup>Y</sup> ET <sup>V</sup> Q <sup>D</sup> R <sup>V</sup> T <sup>P</sup> EE <sup>E</sup> R <sup>K</sup> N <sup>N</sup> R |

B

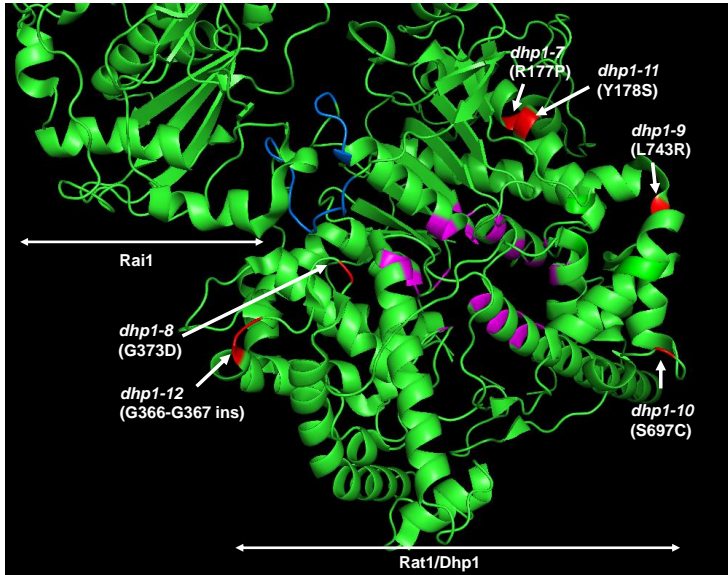

C

|                        | <i>tol1-2</i><br>(A297D)                                                                                       |
|------------------------|----------------------------------------------------------------------------------------------------------------|
| <i>S. pombe</i>        | GGSL <sup>L</sup> VE <sup>E</sup> AGG <sup>V</sup> VSD-MFGK                                                    |
| <i>S. cerevisiae</i>   | AGN <sup>V</sup> VIV <sup>H</sup> EAGG <sup>I</sup> H <sup>T</sup> DAMEDV                                      |
| <i>A. thaliana</i>     | AGA <sup>I</sup> IV <sup>V</sup> TEAGG <sup>I</sup> V <sup>T</sup> DA-AGK                                      |
| <i>O. sativa</i>       | AGS <sup>I</sup> IV <sup>V</sup> TEAGG <sup>L</sup> V <sup>T</sup> DA-SGN                                      |
| <i>O. tauri</i>        | AGV <sup>I</sup> L <sup>V</sup> EEAGG <sup>T</sup> V <sup>S</sup> DA-GGA                                       |
| <i>D. discoideum</i>   | AGH <sup>I</sup> I <sup>V</sup> VEEAGG <sup>I</sup> V <sup>T</sup> DF-KKQ                                      |
| <i>T. brucei</i>       | SK <sup>I</sup> I <sup>W</sup> D <sup>V</sup> CA <sup>G</sup> N <sup>L</sup> L <sup>V</sup> TEAGG <sup>V</sup> |
| <i>X. tropicalis</i>   | AAS <sup>V</sup> I <sup>I</sup> TEAGG <sup>V</sup> V <sup>L</sup> DA-TGG                                       |
| <i>H. sapiens</i>      | GAG <sup>I</sup> I <sup>V</sup> TEAGG <sup>V</sup> L <sup>M</sup> DV-TGG                                       |
| <i>M. musculus</i>     | AAT <sup>V</sup> I <sup>I</sup> REAGG <sup>I</sup> V <sup>I</sup> DT-SGG                                       |
| <i>D. melanogaster</i> | AG <sup>D</sup> L <sup>I</sup> V <sup>R</sup> EAGG <sup>V</sup> V <sup>I</sup> D <sup>P</sup> -AGG             |
| <i>C. elegans</i>      | APS <sup>I</sup> I <sup>V</sup> TEAGG <sup>V</sup> V <sup>T</sup> D <sup>P</sup> -TGS                          |

D

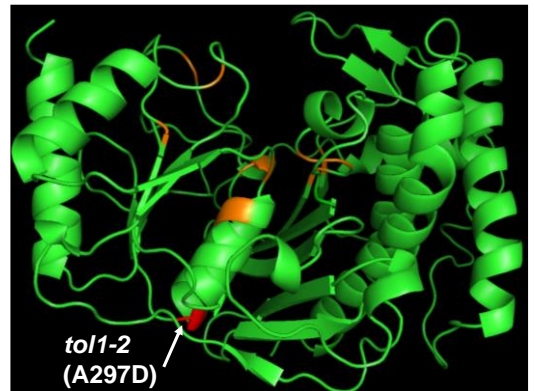

Supplement: pgen.1010215.s010.pdf [file pgen.1010215.s010.pdf]
