# Supplementary material for: Initiator tRNA lacking 1-methyladenosine is targeted by the rapid tRNA decay pathway in evolutionarily distant yeast species
Source: PubMed Central journal article supplement (PMC9362929; doi:10.1371/journal.pgen.1010215), 2022-07-28
Supplement: pgen.1010215.s002.pdf [file pgen.1010215.s002.pdf]

A

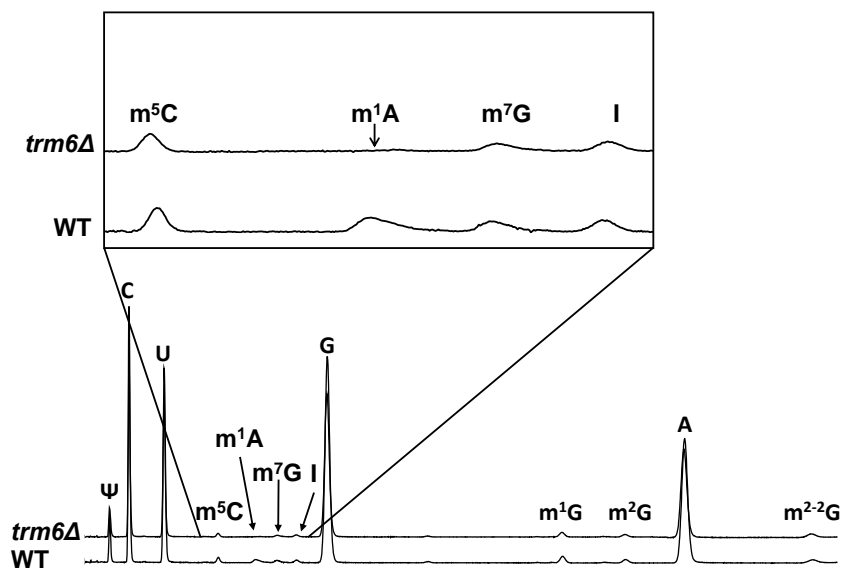

B

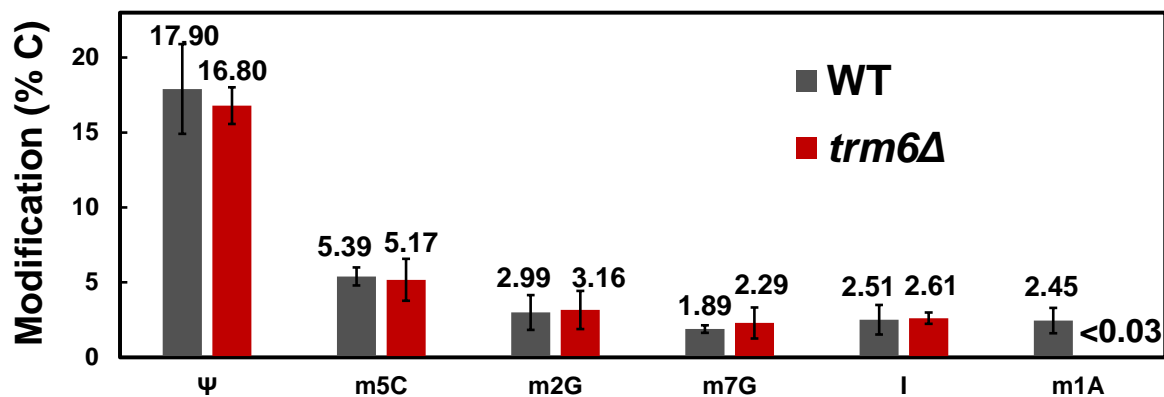

C

| Modification | WT             | <i>trm6Δ</i>   |
|--------------|----------------|----------------|
| $m^1A$       | $2.5 \pm 0.8$  | $<0.03$        |
| $\Psi$       | $17.9 \pm 3.0$ | $16.8 \pm 1.2$ |
| $m^5C$       | $5.4 \pm 0.6$  | $5.2 \pm 1.4$  |
| $m^2G$       | $3.0 \pm 1.2$  | $3.2 \pm 1.3$  |
| $m^7G$       | $1.9 \pm 0.3$  | $2.3 \pm 1.0$  |
| I            | $2.5 \pm 1.0$  | $2.6 \pm 0.4$  |
