# Supplementary material for: Initiator tRNA lacking 1-methyladenosine is targeted by the rapid tRNA decay pathway in evolutionarily distant yeast species
Source: PubMed Central journal article supplement (PMC9362929; doi:10.1371/journal.pgen.1010215), 2022-07-28

A

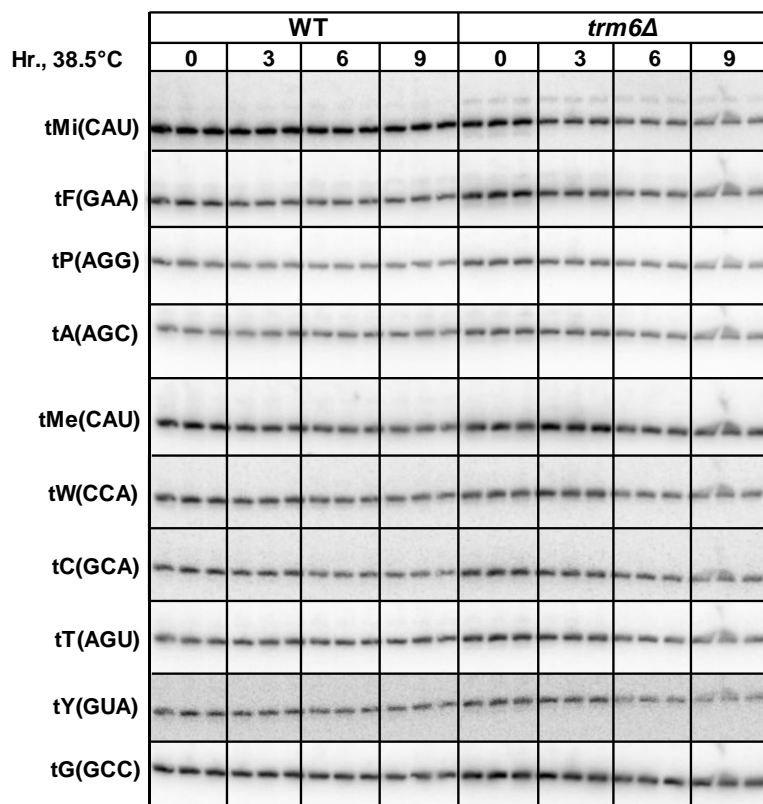

B

*trm6Δ*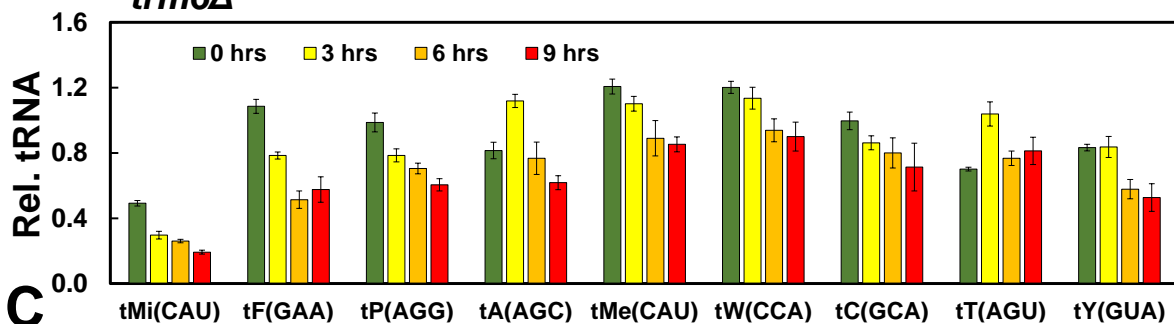

C

WT

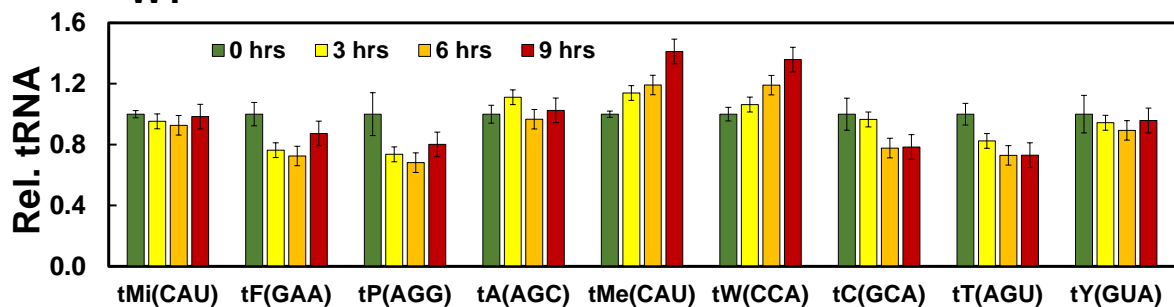

Supplement: pgen.1010215.s003.pdf [file pgen.1010215.s003.pdf]
