# Supplementary material for: Initiator tRNA lacking 1-methyladenosine is targeted by the rapid tRNA decay pathway in evolutionarily distant yeast species
Source: PubMed Central journal article supplement (PMC9362929; doi:10.1371/journal.pgen.1010215), 2022-07-28
Supplement: pgen.1010215.s006.pdf [file pgen.1010215.s006.pdf]

A

|                        | <i>dhp1-6</i><br>(Y669C)        | <i>dhp1-5</i><br>(S737P)         |
|------------------------|---------------------------------|----------------------------------|
| <i>S. pombe</i>        | DLASIDV-KFELNQ-PFKPYEQLLGVLPAA  | LLPFIDENRLLNNAVSKTIYPQLTEEESKRNE |
| <i>D. discoideum</i>   | FFDQFEYFPQYEMGE-PFKPFNQLMSVLPAA | LLPFINSIKLLKTISKTEPLLTEEEVDRNT   |
| <i>S. cerevisiae</i>   | GFSHLEI-KFELGT-PFLPYEQLLMSVLPAA | LLPFIDQDRLLTAVRAQYPLLSDAERARNI   |
| <i>A. thaliana</i>     | DLGEMDI-KFELGT-PFKPFNQLLGVFPAA  | KLPFIDERRLLEAVSEVEFTLTDEEKRRNS   |
| <i>O. sativa</i>       | GLGQLNI-TFELGS-PFKPFDQLMGVFPAA  | KLPFIDEARLLAEIKKVEHTLTPEEARNS    |
| <i>O. tauri</i>        | NLAGIST-DFELGK-PFKPFSQLMGVLPAA  | LLPWIDSRLLLEQTMLEYTLTAEEKRRNS    |
| <i>D. melanogaster</i> | NIQGLST-MFEKGTKPFNPLEQLMGVFPAA  | LLPFVDEKRLFKALVPYYDQLTGEEVKRNR   |
| <i>H. sapiens</i>      | GIADMPS-DFEKGTKPFKPLEQLMGVFPAA  | LLPFVDERLLRAALEEVYDPLTPEETRRNS   |
| <i>M. musculus</i>     | GIADMSS-EFEKGTKPFKPLEQLMGVFPAA  | LLPFVDERLLRAALEEVYDPLTPEENRRNS   |
| <i>X. tropicalis</i>   | NISCLFK-EFEKGTKPFKPLEQLMGVFPAA  | LLPFVDERLLRAALEEVYDPLTPEETRRNS   |
| <i>C. elegans</i>      | F--VGMRMFEFELSE-PFHPEQLLAVLPEA  | LI PFIEEKRLLEATEAKRSRLTSEENARNS  |
| <i>T. brucei</i>       | LPVAACVKFDPGK-PFLPHQQLLAVLPPM   | LI PFIEERTLLAAYETVQDRVTPPEERKNNR |

B

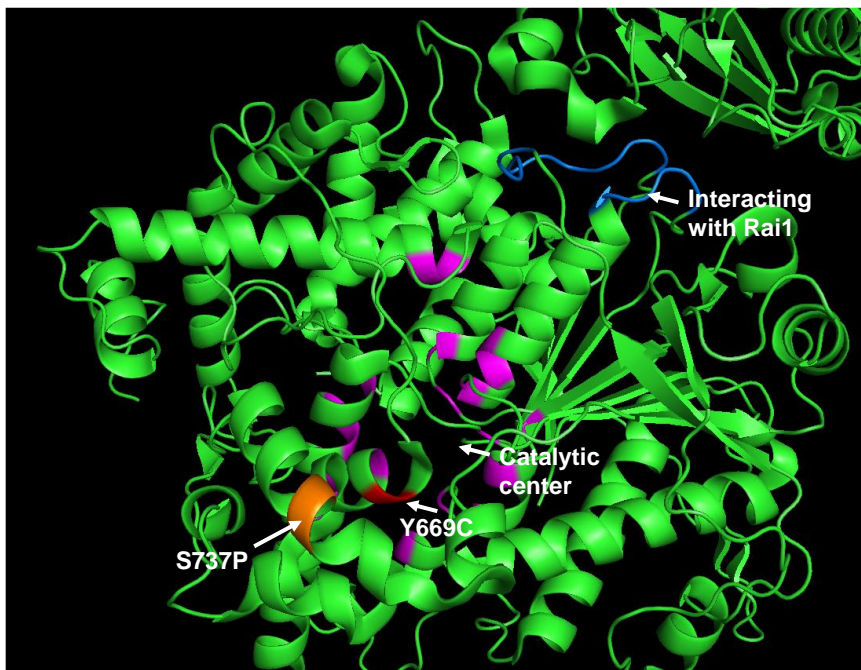

C

|                     |                                         | YES        |      |      |      |
|---------------------|-----------------------------------------|------------|------|------|------|
|                     |                                         | 30°C       | 33°C | 35°C | 37°C |
|                     |                                         | integrated |      |      |      |
| <i>WT</i>           | <i>P<sub>dhp1</sub>dhp1<sup>+</sup></i> |            |      |      |      |
|                     | <i>vec</i>                              |            |      |      |      |
| <i>trm6Δ</i>        | <i>P<sub>dhp1</sub>dhp1<sup>+</sup></i> |            |      |      |      |
|                     | <i>vec</i>                              |            |      |      |      |
| <i>trm6Δ dhp1-5</i> | <i>P<sub>dhp1</sub>dhp1<sup>+</sup></i> |            |      |      |      |
|                     | <i>vec</i>                              |            |      |      |      |
