# Supplementary material for: Initiator tRNA lacking 1-methyladenosine is targeted by the rapid tRNA decay pathway in evolutionarily distant yeast species
Source: PubMed Central journal article supplement (PMC9362929; doi:10.1371/journal.pgen.1010215), 2022-07-28

A

***tol1-1***  
**(A151D)**

↓

|                        |                                                                                                               |
|------------------------|---------------------------------------------------------------------------------------------------------------|
| <i>S. pombe</i>        | PIDG <b>T</b> K <b>G</b> F <b>L</b> R <b>G</b> A-Q <b>Y</b> A <b>I</b> C <b>L</b> A                           |
| <i>S. cerevisiae</i>   | PIDG <b>T</b> K <b>G</b> F <b>L</b> R <b>G</b> E-Q <b>F</b> A <b>V</b> C <b>L</b> A                           |
| <i>A. thaliana</i>     | PIDG <b>T</b> K <b>G</b> F <b>L</b> R <b>G</b> D-Q <b>Y</b> A <b>V</b> A <b>L</b> G                           |
| <i>O. sativa</i>       | PIDG <b>T</b> K <b>G</b> F <b>L</b> R <b>G</b> D-Q <b>Y</b> A <b>I</b> A <b>L</b> A                           |
| <i>O. tauri</i>        | P <b>V</b> D <b>G</b> T <b>L</b> G <b>F</b> V <b>R</b> G <b>D</b> -Q <b>Y</b> A <b>I</b> A <b>L</b> A         |
| <i>D. discoideum</i>   | PIDG <b>T</b> L <b>G</b> F <b>L</b> R <b>K</b> D-Q <b>Y</b> A <b>V</b> A <b>L</b> A                           |
| <i>T. brucei</i>       | PIDG <b>T</b> M <b>S</b> F <b>V</b> H <b>G</b> S <b>C</b> D <b>C</b> C <b>V</b> S <b>I</b> G                  |
| <i>X. tropicalis</i>   | PIDG <b>T</b> T <b>N</b> F <b>V</b> H <b>R</b> F <b>P</b> F <b>V</b> A <b>V</b> S <b>I</b> G                  |
| <i>H. sapiens</i>      | PIDG <b>T</b> T <b>N</b> F <b>V</b> H <b>R</b> F <b>P</b> F <b>V</b> A <b>V</b> S <b>I</b> G                  |
| <i>M. musculus</i>     | PIDG <b>T</b> C <b>N</b> F <b>V</b> H <b>R</b> F <b>P</b> T <b>V</b> A <b>V</b> S <b>I</b> G                  |
| <i>D. melanogaster</i> | P <b>V</b> D <b>G</b> T <b>M</b> N <b>F</b> V <b>H</b> A <b>F</b> P <b>H</b> S <b>C</b> I <b>S</b> V <b>G</b> |
| <i>C. elegans</i>      | PIDG <b>T</b> T <b>N</b> F <b>V</b> H <b>R</b> I <b>P</b> M <b>I</b> A <b>I</b> C <b>V</b> G                  |

B

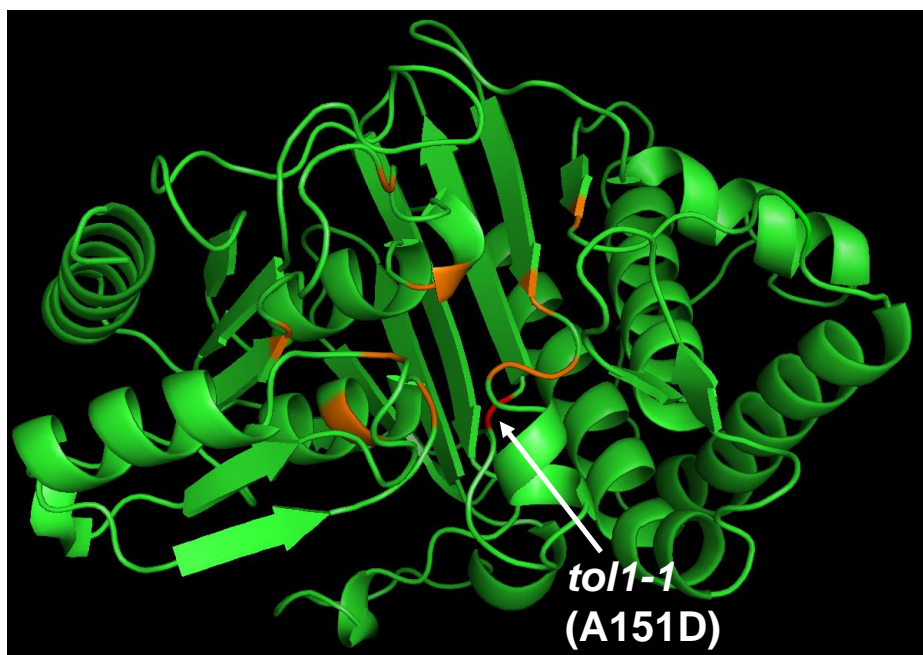

Supplement: pgen.1010215.s008.pdf [file pgen.1010215.s008.pdf]
