# Supplementary material for: Initiator tRNA lacking 1-methyladenosine is targeted by the rapid tRNA decay pathway in evolutionarily distant yeast species
Source: PubMed Central journal article supplement (PMC9362929; doi:10.1371/journal.pgen.1010215), 2022-07-28
Supplement: pgen.1010215.s016.pdf [file pgen.1010215.s016.pdf]

A

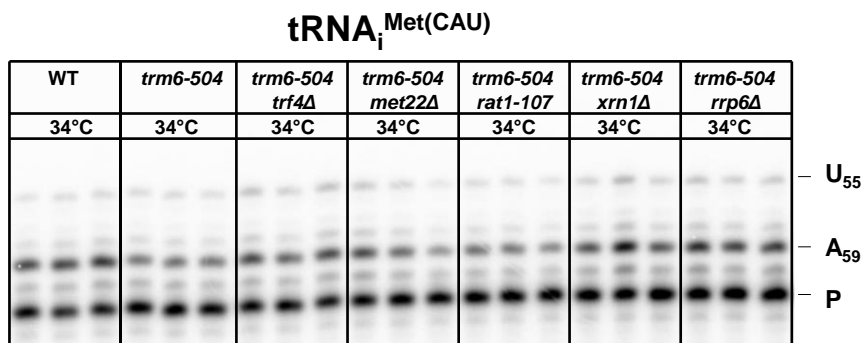

B

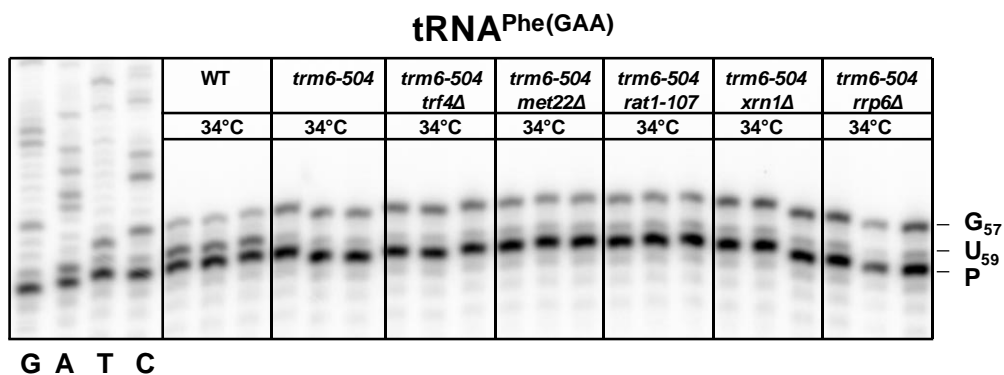

C

| strain                   | avg % m <sup>1</sup> A <sub>58</sub> of total tRNA |                          |
|--------------------------|----------------------------------------------------|--------------------------|
|                          | tRNA <sub>i</sub> <sup>Met(CAU)</sup>              | tRNA <sup>Phe(GAA)</sup> |
| WT                       | 97.6 ± 0.3                                         | 81.8 ± 0.7               |
| <i>trm6-504</i>          | 94.8 ± 0.7                                         | 37.2 ± 1.2               |
| <i>trm6-504 trf4Δ</i>    | 92.6 ± 0.9                                         | 29.1 ± 2.0               |
| <i>trm6-504 met22Δ</i>   | 94.5 ± 0.9                                         | 44.0 ± 1.5               |
| <i>trm6-504 rat1-107</i> | 95.2 ± 0.2                                         | 44.0 ± 2.1               |
| <i>trm6-504 xrn1Δ</i>    | 94.3 ± 1.0                                         | 30.0 ± 2.0               |
| <i>trm6-504 rrp6Δ</i>    | 94.9 ± 0.4                                         | 28.3 ± 3.3               |
