# Supplementary material for: Initiator tRNA lacking 1-methyladenosine is targeted by the rapid tRNA decay pathway in evolutionarily distant yeast species
Source: PubMed Central journal article supplement (PMC9362929; doi:10.1371/journal.pgen.1010215), 2022-07-28
Supplement: pgen.1010215.s018.pdf [file pgen.1010215.s018.pdf]

1 **Table S1. *S. pombe* strains used in this study**

2

| Strain name | Parent strain | Genotype                                                            | Source     |
|-------------|---------------|---------------------------------------------------------------------|------------|
| YMT 599     |               | WT                                                                  | [1]        |
| YMT 621     | YMT 599       | <i>trm6Δ::kanR</i>                                                  | This study |
| YMT 654     | YMT 599       | <i>trm61Δ::kanR</i>                                                 | This study |
| YMT 652-4A  | YMT 621       | <i>trm6Δ::kanR sup9 dhp1-5 (dhp1-S737P)</i>                         | This study |
| YMT 828-3A  | YMT 621       | <i>trm6Δ::kanR sup18 tol1-1 (A151D)</i>                             | This study |
| YMT 828-6B  | YMT 621       | <i>trm6Δ::kanR sup25 dhp1-6 (Y669C)</i>                             | This study |
| YMT 741     | YMT 599       | <i>ura4<sup>+</sup>::dhp1<sup>+</sup></i>                           | This study |
| YMT 722     | YMT 599       | WT <i>ura4<sup>+</sup></i>                                          | This study |
| YMT 742     | YMT 621       | <i>trm6Δ::kanR ura4<sup>+</sup></i>                                 | This study |
| YMT 723     | YMT 621       | <i>trm6Δ::kanR ura4<sup>+</sup>::dhp1<sup>+</sup></i>               | This study |
| YMT 743     | YMT 652-4A    | <i>trm6Δ::kanR dhp1-5 ura4<sup>+</sup>::dhp1<sup>+</sup></i>        | This study |
| YMT 872     | YMT 652-4A    | <i>trm6Δ::kanR dhp1-5 ura4<sup>+</sup></i>                          | This study |
| YMT 731     | YMT 599       | <i>imt06Δ::hygR</i>                                                 | This study |
| YMT 732     | YMT 621       | <i>trm6Δ::kanR imt06Δ::hygR</i>                                     | This study |
| YMT 807     | YMT 732       | <i>trm6Δ::kanR imt06Δ::hygR ura4<sup>+</sup>::imt06<sup>+</sup></i> | This study |
| YMT 733-1C  | YMT 732       | <i>trm6Δ::kanR imt06Δ::hygR sup26 dhp1-9 (L743R)</i>                | This study |
| YMT 733-1F  | YMT 732       | <i>trm6Δ::kanR imt06Δ::hygR sup27 dhp1-10 (S697C)</i>               | This study |
| YMT 733-2A  | YMT 732       | <i>trm6Δ::kanR imt06Δ::hygR sup29 dhp1-8 (G373D)</i>                | This study |
| YMT 733-2D  | YMT 732       | <i>trm6Δ::kanR imt06Δ::hygR sup30 dhp1-8 (G373D)</i>                | This study |
| YMT 733-2G  | YMT 732       | <i>trm6Δ::kanR imt06Δ::hygR sup31 dhp1-12 (366 ins)</i>             | This study |
| YMT 733-3A  | YMT 732       | <i>trm6Δ::kanR imt06Δ::hygR sup32 dhp1-7 (R177P)</i>                | This study |
| YMT 733-3B  | YMT 732       | <i>trm6Δ::kanR imt06Δ::hygR sup33 dhp1-11 (Y178S)</i>               | This study |
| YMT 733-3E  | YMT 732       | <i>trm6Δ::kanR imt06Δ::hygR sup34 dhp1-11 (Y178S)</i>               | This study |
| YMT 734-1E  | YMT 732       | <i>trm6Δ::kanR imt06Δ::hygR sup36 tol1-2 (A297D)</i>                | This study |
| YMT 845     | YMT 621       | <i>trm6Δ::kanR cid14Δ::hygR</i>                                     | This study |
| YMT 846     | YMT 599       | <i>cid14Δ::hygR</i>                                                 | This study |

3

4

#### References

5

- 6 1. De Zoysa T, Phizicky EM. Hypomodified tRNA in evolutionarily distant yeasts can trigger rapid  
7 tRNA decay to activate the general amino acid control response, but with different consequences.  
8 PLoS Genet. 2020;16(8):e1008893.

9
