# Supplementary material for: Initiator tRNA lacking 1-methyladenosine is targeted by the rapid tRNA decay pathway in evolutionarily distant yeast species
Source: PubMed Central journal article supplement (PMC9362929; doi:10.1371/journal.pgen.1010215), 2022-07-28
Supplement: pgen.1010215.s019.pdf [file pgen.1010215.s019.pdf]

1 **Table S2. *S. cerevisiae* strains used in this study**

2

| Strain name | Parent strain | Genotype                                                                        | Source                     |
|-------------|---------------|---------------------------------------------------------------------------------|----------------------------|
| BY4741      |               | <i>MATa his3Δ1 leu2Δ0 met15Δ0 ura3Δ0</i>                                        | Standard laboratory strain |
| YMT 412     | BY4741        | <i>BY4741, HIS3<sup>+</sup></i>                                                 | This study                 |
| YMT 678     | YMT 412       | <i>trm6-504, HIS3<sup>+</sup></i>                                               | This study                 |
| YMT 681     | YMT 678       | <i>trm6-504 met22Δ::kanR, HIS3<sup>+</sup></i>                                  | This study                 |
| YMT 702     | YMT 678       | <i>trm6-504 rat1-107::URA3, HIS3<sup>+</sup></i>                                | This study                 |
| YMT 706     | YMT 678       | <i>trm6-504 rrp6Δ::kanR, HIS3<sup>+</sup></i>                                   | This study                 |
| YMT 708     | YMT 678       | <i>trm6-504 xrn1Δ::kanR, HIS3<sup>+</sup></i>                                   | This study                 |
| YMT 736     | YMT 678       | <i>trm6-504 trf4Δ::kanR, HIS3<sup>+</sup></i>                                   | This study                 |
| YMT 655     |               | <i>MATa gcn2-101, ino1-29, ura3-52, ino1 (HIS4-lacZ, ura3-52)</i>               | [1]                        |
| YMT 656     |               | <i>MATa trm6-504, gcn2-101, ino1-29, ura3-52, ino1 (HIS4-lacZ, ura3-52)</i>     | [1]                        |
| YMT 661     | YMT 656       | Y190 <i>trm6-504 met22Δ::kanR</i>                                               | This study                 |
| YMT 667     | BY4741        | BY4741 [ <i>P<sub>GAL</sub> TRM6 URA3 2μ</i> ]                                  | This study                 |
| YMT 668     | BY4741        | BY4741 [ <i>URA3 2μ</i> ]                                                       | This study                 |
| YMT 673     | YMT 667       | <i>trm6Δ::bleR [P<sub>GAL</sub> TRM6 URA3 2μ]</i>                               | This study                 |
| YMT 754     | YMT 717       | <i>trm6Δ::bleR met22Δ::kanR trf4Δ::hygR [P<sub>GAL</sub> TRM6 URA3 2μ]</i>      | This study                 |
| YMT 755     | YMT 673       | <i>trm6Δ::bleR trf4Δ::hygR [P<sub>GAL</sub> TRM6 URA3 2μ]</i>                   | This study                 |
| YMT 717     | YMT 673       | <i>trm6Δ::bleR met22Δ::kanR [P<sub>GAL</sub> TRM6 URA3 2μ]</i>                  | This study                 |
| YMT 660     | BY4741        | <i>met22Δ::kanR</i>                                                             | This study                 |
| YMT 756     | YMT 001       | <i>trf4Δ::hygR</i>                                                              | This study                 |
| YMT 757     | YMT 660       | <i>met22Δ::kanR trf4Δ::hygR</i>                                                 | This study                 |
| YMT 716     | YMT 668       | <i>met22Δ::kanR [URA3 2μ]</i>                                                   | This study                 |
| YMT 839     | YMT 660       | <i>met22Δ::kanR [P<sub>GAL</sub> TRM6 URA3 2μ]</i>                              | This study                 |
| YMT 763     | YMT 756       | <i>trf4Δ::hygR [URA3 2μ]</i>                                                    | This study                 |
| YMT 840     | YMT 756       | <i>trf4Δ::hygR [P<sub>GAL</sub> TRM6 URA3 2μ]</i>                               | This study                 |
| YMT 764     | YMT 757       | <i>met22Δ::kanR trf4Δ::hygR [URA3 2μ]</i>                                       | This study                 |
| YMT 823     | YMT 754       | <i>trm6Δ::bleR met22Δ::kanR trf4Δ::hygR</i>                                     | This study                 |
| YMT 765     | YMT 667       | BY4741 [ <i>P<sub>GAL</sub> TRM6 URA3 2μ</i> ] [ <i>LEU2 2μ</i> ]               | This study                 |
| YMT 766     | YMT 678       | <i>trm6-504 [P<sub>GAL</sub> TRM6 URA3 2μ] [LEU2 2μ], HIS3<sup>+</sup></i>      | This study                 |
| YMT 767     | YMT 673       | <i>trm6Δ::bleR [P<sub>GAL</sub> TRM6 URA3 2μ] [LEU2 2μ]</i>                     | This study                 |
| YMT 770     | YMT 667       | BY4741 [ <i>P<sub>GAL</sub> TRM6 URA3 2μ</i> ] [ <i>IMT1 LEU2 2μ</i> ]          | This study                 |
| YMT 771     | YMT 678       | <i>trm6-504 [P<sub>GAL</sub> TRM6 URA3 2μ] [IMT1 LEU2 2μ], HIS3<sup>+</sup></i> | This study                 |
| YMT 772     | YMT 673       | <i>trm6Δ::bleR [P<sub>GAL</sub> TRM6 URA3 2μ] [IMT1 LEU2 2μ]</i>                | This study                 |

3  
4 **References**

- 5  
6 1. Kadaba S, Krueger A, Trice T, Krecic AM, Hinnebusch AG, Anderson J. Nuclear surveillance  
7 and degradation of hypomodified initiator tRNAMet in *S. cerevisiae*. *Genes Dev.* 2004;18(11):1227-  
8 40.
