# Supplementary material for: Initiator tRNA lacking 1-methyladenosine is targeted by the rapid tRNA decay pathway in evolutionarily distant yeast species
Source: PubMed Central journal article supplement (PMC9362929; doi:10.1371/journal.pgen.1010215), 2022-07-28
Supplement: pgen.1010215.s020.pdf [file pgen.1010215.s020.pdf]

1  
2  
3

**Table S3 Plasmids used in this study**

| Plasmid   | Parent   | Description                                                           | Source            |
|-----------|----------|-----------------------------------------------------------------------|-------------------|
| pREP3x    |          | <i>leu2<sup>+</sup> P<sub>nmt1</sub></i>                              | [1]               |
| AB 553-1  | pREP3x   | <i>leu2<sup>+</sup> with a NotI between PstI and P<sub>nmt1</sub></i> | [2]               |
| EMT 256-1 | pREP3x   | <i>leu2<sup>+</sup> P<sub>trm6</sub> trm6<sup>+</sup></i>             | This study        |
| EMT 257-2 | pREP3x   | <i>leu2<sup>+</sup> P<sub>trm61</sub> trm61<sup>+</sup></i>           | This study        |
| EMT 265-1 | AB 553-1 | <i>leu2<sup>+</sup> imt06<sup>+</sup></i>                             | This study        |
| EMT 264-1 | AB 553-1 | <i>leu2<sup>+</sup> sup9<sup>+</sup>-imt07<sup>+</sup></i>            | This study        |
| EMT 327-1 | AB 553-1 | <i>leu2<sup>+</sup> P<sub>tol1</sub> tol1<sup>+</sup></i>             | This study        |
| EMT 292   |          | <i>ura4<sup>+</sup> single integrating vector (SIV)</i>               | [3]               |
| EMT 301-3 | EMT 292  | <i>ura4<sup>+</sup>::dhp1<sup>+</sup></i>                             | This study        |
| EMT 304-1 | EMT 292  | <i>ura4<sup>+</sup>::imt06<sup>+</sup></i>                            | This study        |
| EMT 324   |          | <i>URA3 P<sub>GAL</sub> TRM6 2μ</i>                                   | [4]               |
| EMP 881   |          | <i>URA3 2μ</i>                                                        | Laboratory strain |
| EMT 306-1 |          | <i>LEU2 2μ IMT1</i>                                                   | this study        |
| EMP 824   |          | <i>LEU2 2μ</i>                                                        | Laboratory strain |
| EMT 386   |          | <i>leu2<sup>+</sup> P<sub>cid14</sub> cid14<sup>+</sup></i>           | this study        |

**References**

4  
5  
6  
7  
8  
9  
10  
11  
12  
13  
14  
15  
16  
17

1. Forsburg SL. Comparison of Schizosaccharomyces pombe expression systems. Nucleic Acids Res. 1993;21(12):2955-6.
2. De Zoysa T, Phizicky EM. Hypomodified tRNA in evolutionarily distant yeasts can trigger rapid tRNA decay to activate the general amino acid control response, but with different consequences. PLoS Genet. 2020;16(8):e1008893.
3. Vjestica A, Marek M, Nkosi PJ, Merlini L, Liu G, Berard M, et al. A toolbox of stable integration vectors in the fission yeast Schizosaccharomyces pombe. J Cell Sci. 2020;133(1).
4. Gelperin DM, White MA, Wilkinson ML, Kon Y, Kung LA, Wise KJ, et al. Biochemical and genetic analysis of the yeast proteome with a movable ORF collection. Genes Dev. 2005;19(23):2816-26.
