# Supplementary material for: Initiator tRNA lacking 1-methyladenosine is targeted by the rapid tRNA decay pathway in evolutionarily distant yeast species
Source: PubMed Central journal article supplement (PMC9362929; doi:10.1371/journal.pgen.1010215), 2022-07-28
Supplement: pgen.1010215.s021.pdf [file pgen.1010215.s021.pdf]

1  
2  
3**Table S4. Oligomers used for northern analysis**

| Name           | Target tRNA     | Probe 5'-3'  | Sequence                     |
|----------------|-----------------|--------------|------------------------------|
| OMT 530        | tF(GAA)         | 58-37        | TCGAACCGATGACCAACAGATC       |
| OMT 602        | tMi(CAU)        | 57-38        | CGATCCTGGGACCTACGGGT         |
| OMT 623        | tA(AGC)         | 57-39        | CGAATCTGGGACCTCTTCC          |
| OMT 624        | tT(AGU)         | 19-1         | ACCACTGAGCTACAAGAGC          |
| OMT 625        | tG(GCC)         | 76-59        | TGGTGCTTTGGCCGGGAA           |
| OMT 626        | tY(GUA)         | 57-39        | CGAACTAGCGACCAACCGG          |
| TDZ 123        | tMe(CAU)        | 20-1         | ACCGACTGAGCTACAGAAGC         |
| TDZ 177        | tP(AGG)         | 27-5         | GGTATCATACCACTAGACCAAAC      |
| TDZ 184        | tC(GCA)         | 22-1         | CTAACCACTGAGCTATGACCCC       |
| TDZ 185        | tW(CCA)         | 22-1         | CTACCAACTGAGTTAAGGGGCC       |
| <i>OMT 384</i> | <i>tF(GAA)</i>  | <i>76-59</i> | <i>TGGTGCGAATTCTGTGGA</i>    |
| <i>OMT 596</i> | <i>tMi(CAU)</i> | <i>57-38</i> | <i>CGATCCGAGGACATCAGGGT</i>  |
| <i>OMT 603</i> | <i>tA(UGC)</i>  | <i>73-53</i> | <i>TGGACGCAACCGGAATCGAAC</i> |
| <i>OMT 604</i> | <i>tL(CAA)</i>  | <i>62-e3</i> | <i>AGATTTCGAACTCTTGATCTT</i> |
| <i>OMT 617</i> | <i>tMe(CAU)</i> | <i>56-38</i> | <i>GAACTCTCGACCTTCAGAT</i>   |

4  
5  
6

<sup>a</sup>Note that *S. cerevisiae* oligomers are indicated in italics
