# Supplementary material for: Initiator tRNA lacking 1-methyladenosine is targeted by the rapid tRNA decay pathway in evolutionarily distant yeast species
Source: PubMed Central journal article supplement (PMC9362929; doi:10.1371/journal.pgen.1010215), 2022-07-28
Supplement: pgen.1010215.s022.pdf [file pgen.1010215.s022.pdf]

1 **Table S5. Oligomers used for primer extension analysis**

| Name           | Target tRNA     | Probe 5'-3'  | Sequence                 |
|----------------|-----------------|--------------|--------------------------|
| OMT 775        | tMi(CAU)        | 76-61        | TGGTTGCGCGGCCAGG         |
| OMT 477        | tY(GUA)         | 76-61        | TGGTCTCCTGAGCCAG         |
| <i>OMT 630</i> | <i>tMi(CAU)</i> | <i>76-61</i> | <i>TGGTAGCGCCGCTCGG</i>  |
| <i>OMT 631</i> | <i>tF(GAA)</i>  | <i>76-60</i> | <i>TGGTGCGAATTCTGTGG</i> |

2 <sup>a</sup>Note that *S. cerevisiae* oligomers are indicated in italics

3  
4  
5
